# Supplementary material
Source: ML conference proceedings conference paper supplement (https://proceedings.neurips.cc/paper_files/paper/2022/hash/4ffbfbcf4ad7304d57158b046525e46c-Abstract.html)
Supplement: Supplementary file 1 [file 4ffbfbcf4ad7304d57158b046525e46c-Supplemental-Conference.zip]

Archive with 1 entries (1 files):
- VEPM_supplementary/VEPM_appendix.pdf
